# Supplementary material
Source: PubMed Central journal article supplement (PMC5715589)
Supplement: BPH-174-4345-s001.pdf [file BPH-174-4345-s001.pdf]

## Supplementary Data

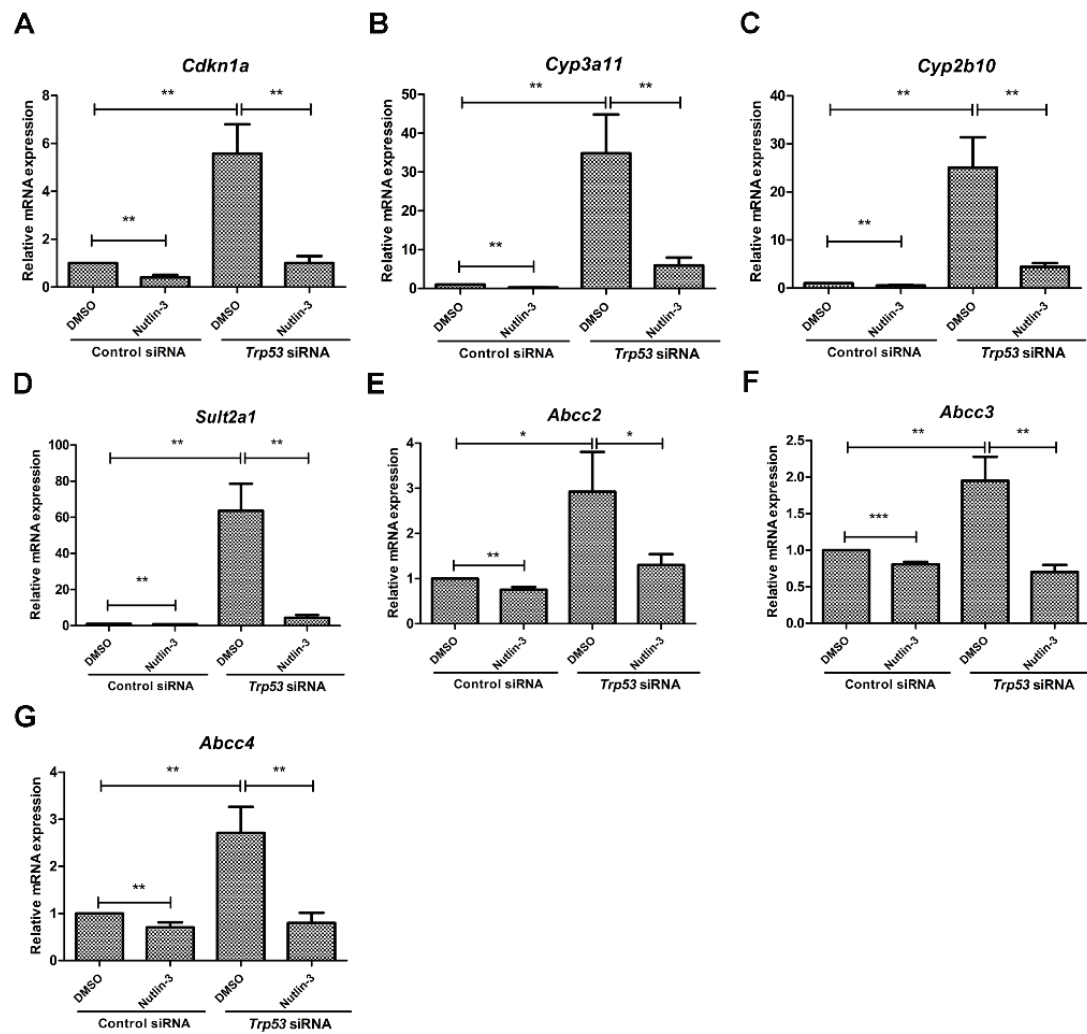

**Supplementary Fig. 1.** Effects of p53 activation on bile acid disposition related gene expression in primary hepatocytes of *Trp53*-WT mice.

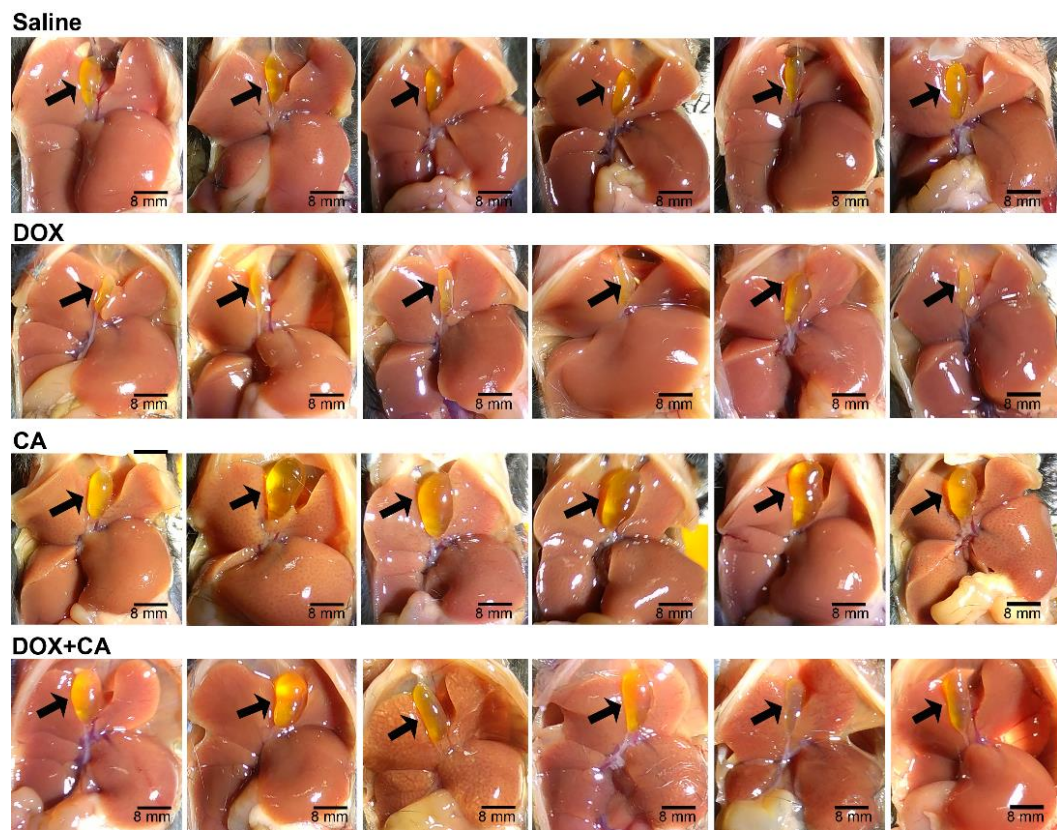

**Supplementary Fig. 2.** Effects of p53 activator Dox on morphology of liver and gallbladder in *Trp53*-WT mice.

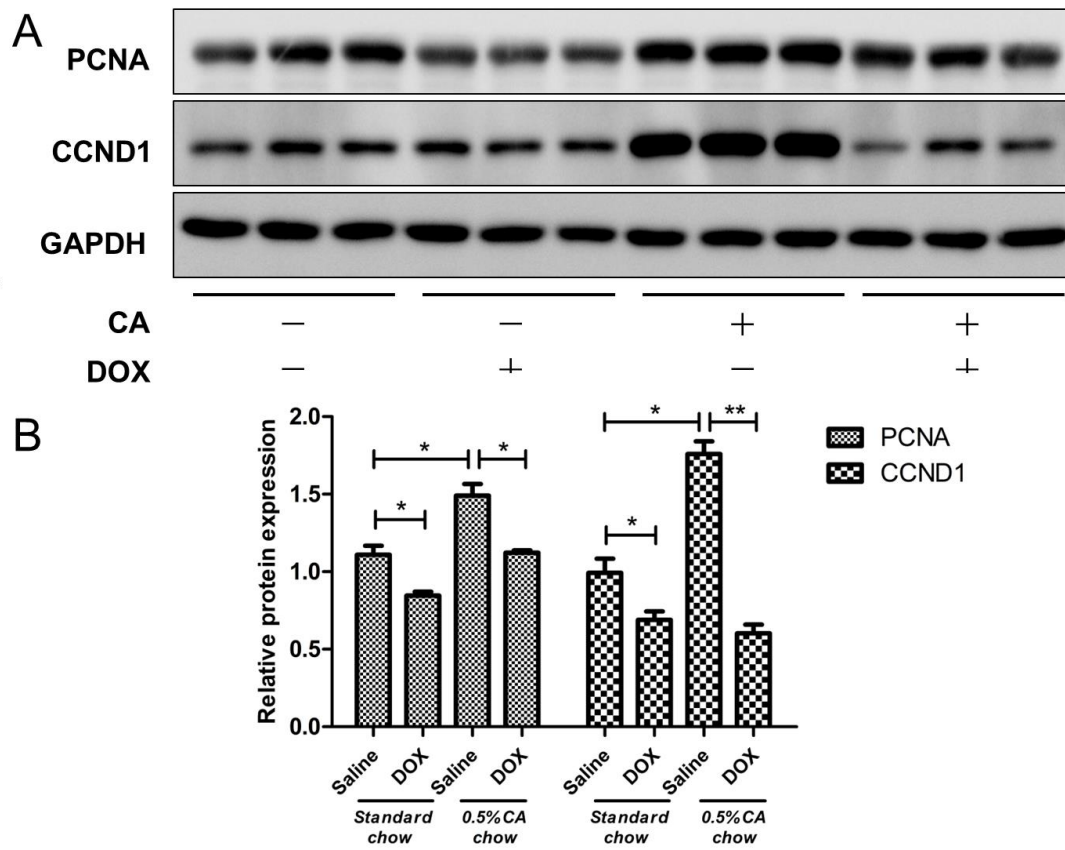

**Supplementary Fig. 3.** Effects of p53 activator Dox on liver regeneration related gene expression in CA-fed *Trp53*-WT mice.

**Supplementary Table 1.** Sequences of the gene-specific primers

| Gene           | Species | Genbank      | Forward primer (5'→3') | Reverse primer (5'→3')   |
|----------------|---------|--------------|------------------------|--------------------------|
| <i>Gapdh</i>   | Mouse   | NM_008084    | AGGTCGGTGTGAACGGATTTG  | GGGGTCGTTGATGGCAACA      |
| <i>Trp53</i>   | Mouse   | NM_011640    | CTCTCCCCGCAAAAGAAAAA   | CGGAACATCTCGAAGCGTTTA    |
| <i>Cdkn1a</i>  | Mouse   | NM_001111099 | CCTGGTGATGTCCGACCTG    | CCATGAGCGCATCGCAATC      |
| <i>Slc10a1</i> | Mouse   | NM_001177561 | CAAACCTCAGAAGGACCAAACA | GTAGGAGGATTATTCGGTTGTG   |
| <i>Slco1b2</i> | Mouse   | NM_020495    | GCACTGCGATGGATTCAGGAT  | AGCTTTGGTCGGTGTAGCTTG    |
| <i>Abcb11</i>  | Mouse   | NM_021022    | TCTGACTCAGTGATTCTTCGCA | CCCATAAACATCAGCCAGTTGT   |
| <i>Abcc2</i>   | Mouse   | NM_013806    | GTGTGGATTCCCTTGGGCTTT  | CACAACGAACACCTGCTTGG     |
| <i>Abcc3</i>   | Mouse   | NM_029600    | CTGGGTCCCTGCATCTAC     | GCCGTCTTGAGCTGGATAAC     |
| <i>Abcc4</i>   | Mouse   | NM_001033336 | CATCGCGGTAACCGTCCTC    | CCGCAGTTTTACTCCGCAG      |
| <i>Cyp7a1</i>  | Mouse   | NM_007824    | GAACTCCTTTGGACAACGGG   | GGAGTTGTGATGAAGTGGACAT   |
| <i>Cyp3a11</i> | Mouse   | NM_007818    | GGATGAGATCGATGAGGCTCTG | CAGGTATTCCATCTCCATCACAGT |
| <i>Cyp2b10</i> | Mouse   | NM_009999    | TGCTGTGTTGAGCCAACC     | CCACTAAACATTGGGCTTCTCT   |
| <i>Sult2a1</i> | Mouse   | NM_001111296 | GAAGGCATACCTTTTCTGCCAT | GTAACCAGACACAAGAATATCTCT |
| <i>Ugt1a1</i>  | Mouse   | NM_201645    | GCTTCTCCGTACCTTCTGTTG  | GCTGCTGAATAACTCCAAGCAT   |

**Supplementary Table 2: Sequences of Primers Used in ChIP Assay**

| Gene                     | 5'- 3' Forward         | 3'- 5' Reverse             |
|--------------------------|------------------------|----------------------------|
| <b>ABCC3 promoter 1</b>  | TACCAGTGGGGGAAGCCTC    | CTTGAGCGGGATGCACTT         |
| <b>ABCC3 promoter 2</b>  | GGAGAGTTGGAGGAAGCCG    | AAGGGCAGGGACTAACTCAG       |
| <b>ABCC3 promoter 3</b>  | ATTGGAGGGGACTGAGTTAGTC | CCTTTCCACTCATCCACACA       |
| <b>ABCC3 promoter 4</b>  | CAGGGCAACAGCGGGATTG    | GCCCCAGGAGGAGCCCCAC        |
| <b>CYP2B6 promoter 1</b> | TTTGAACATGCACTACCACCAC | TCTATTTTTGTAAGCATAGGTGAGCT |
| <b>CYP2B6 promoter 2</b> | GGTGCAGGGCAGTCAGAC     | TTCCCAAAGGGGCAGA           |
